# Supplementary material for: Chromatin Interaction Changes during the iPSC-NPC Model to Facilitate the Study of Biologically Significant Genes Involved in Differentiation
Source: MDPI journal article supplement (doi:10.3390/genes11101176), 2020-10-08
Supplement: s1 [file s1]

# Supplementary Figure 1

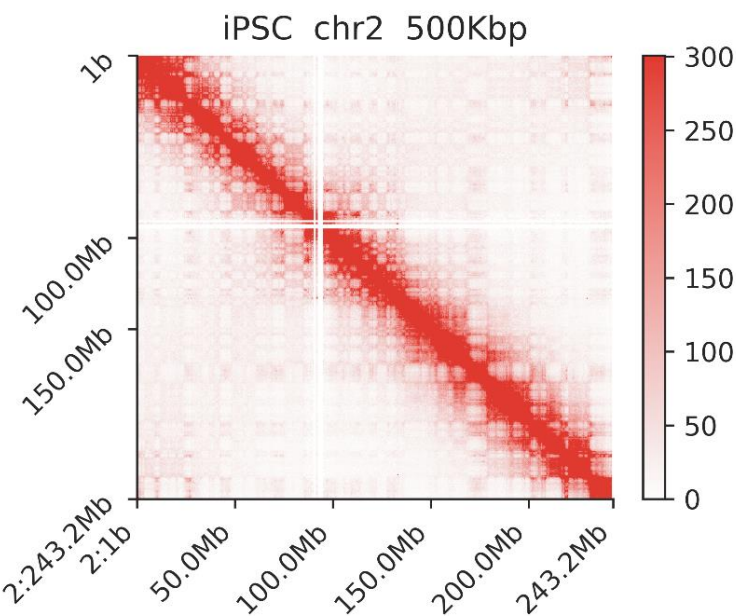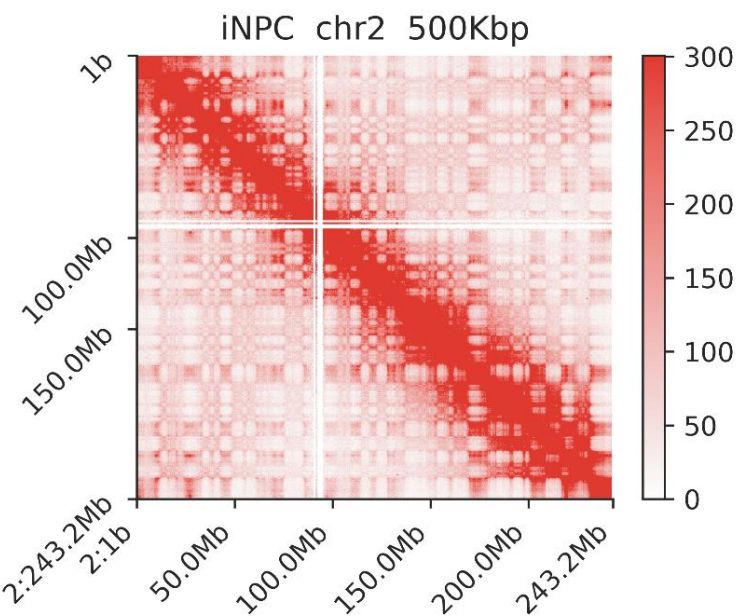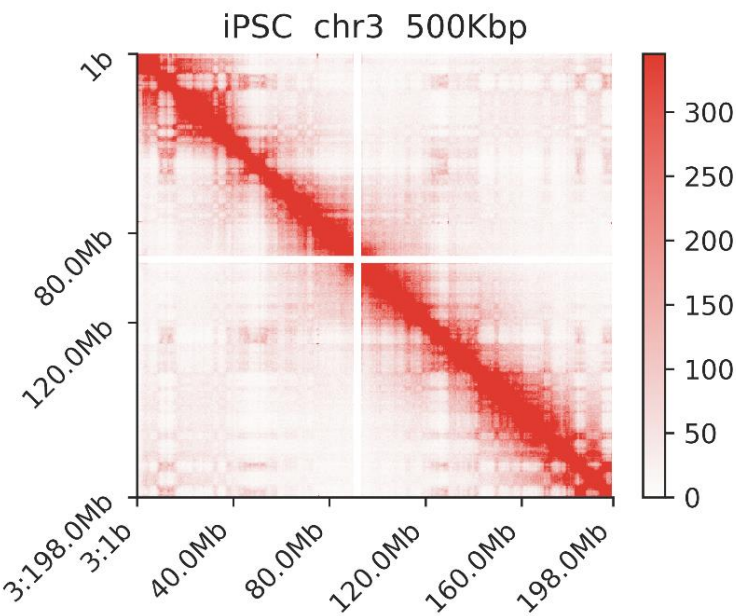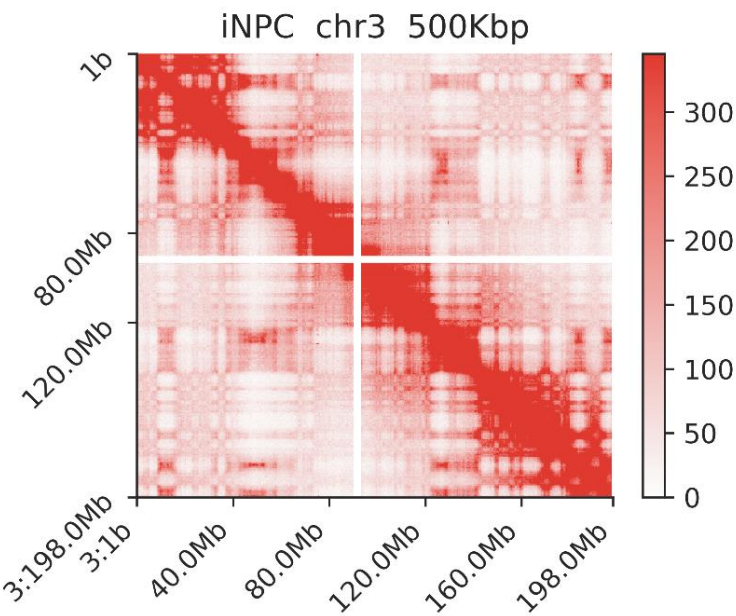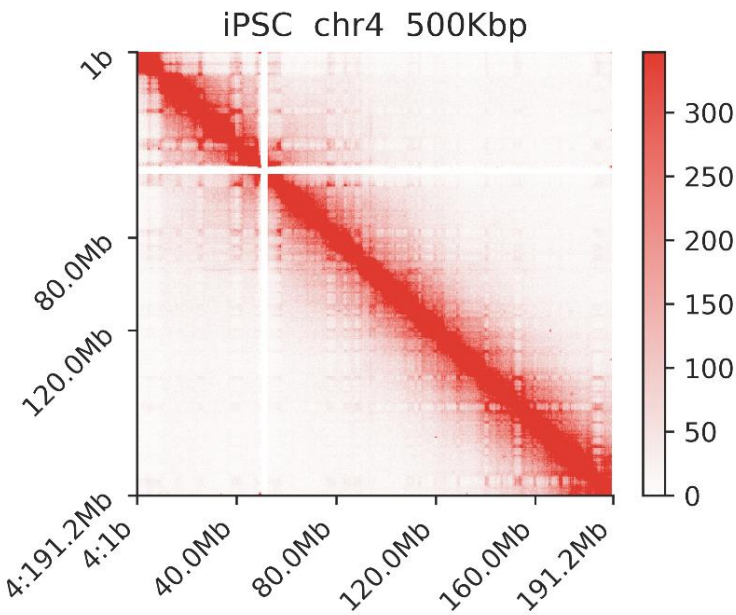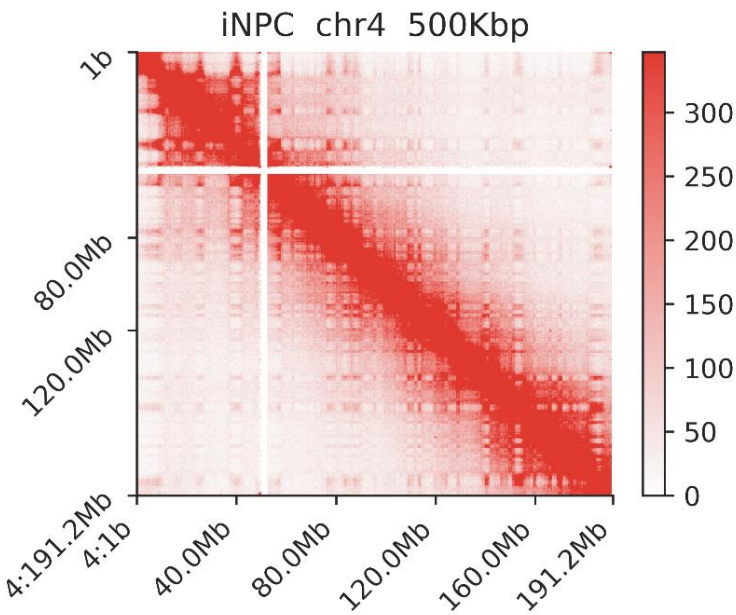

# Supplementary Figure 1 (continued)

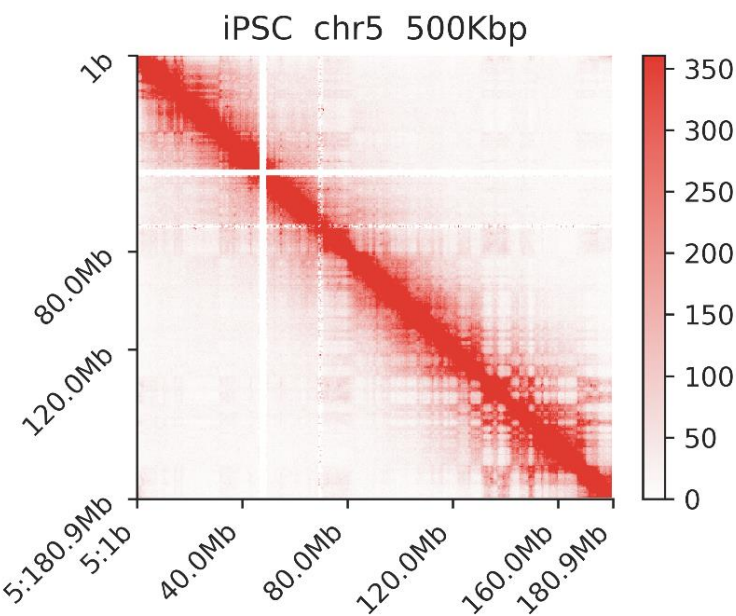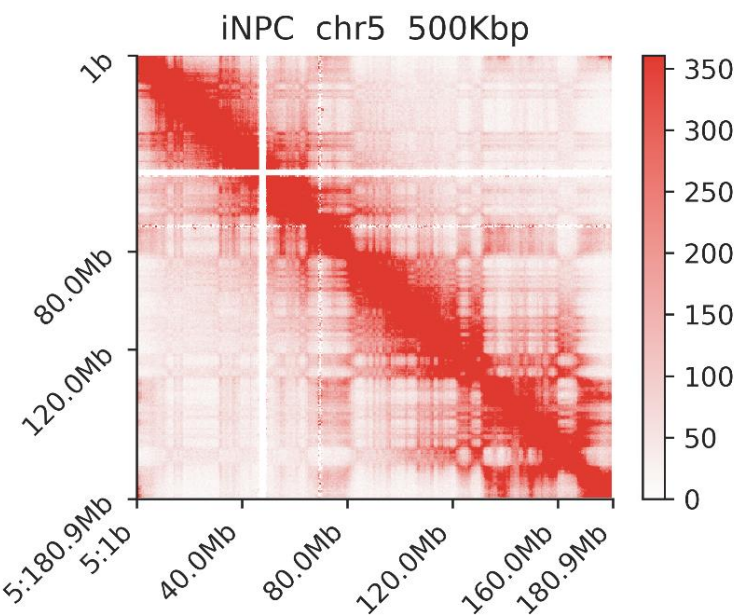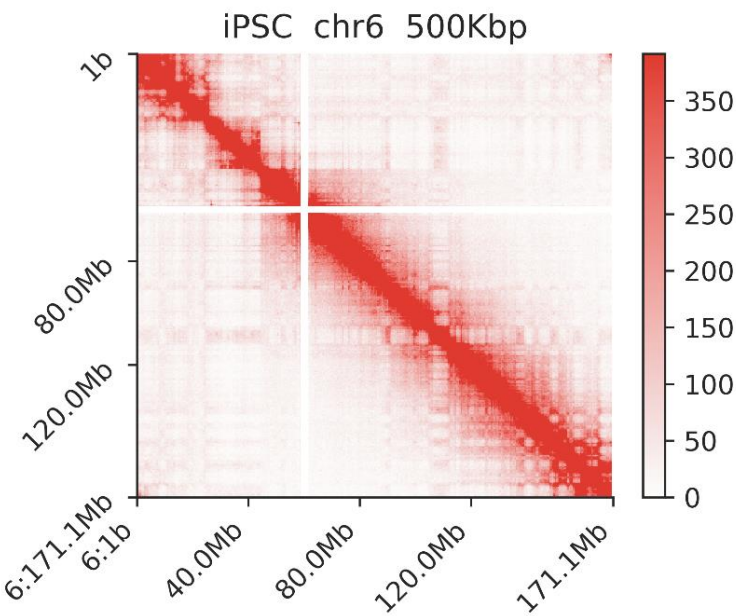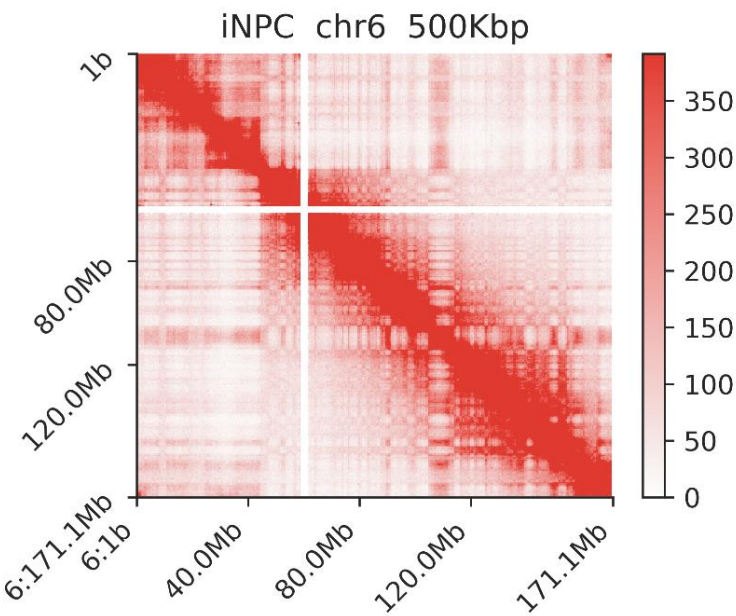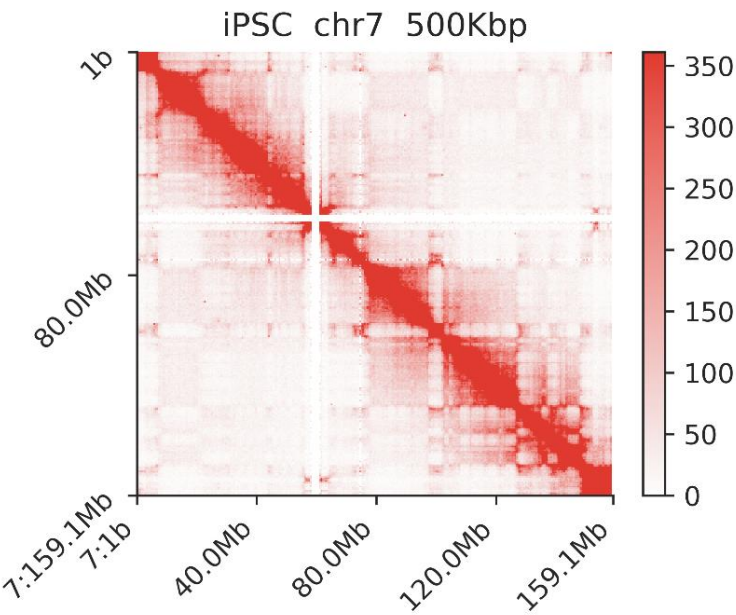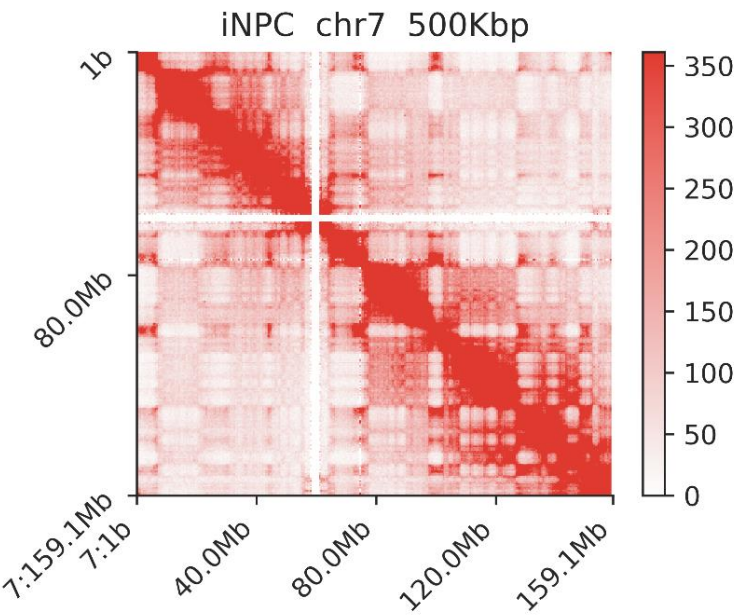

# Supplementary Figure 1 (continued)

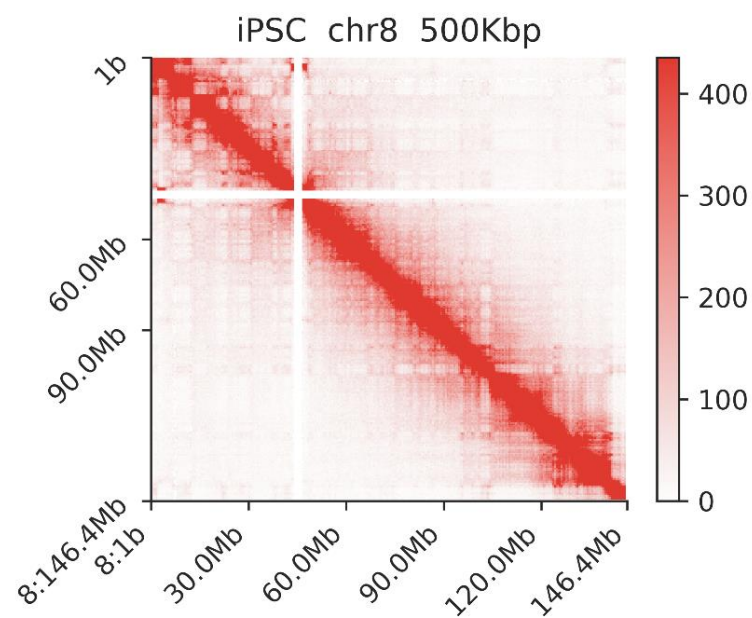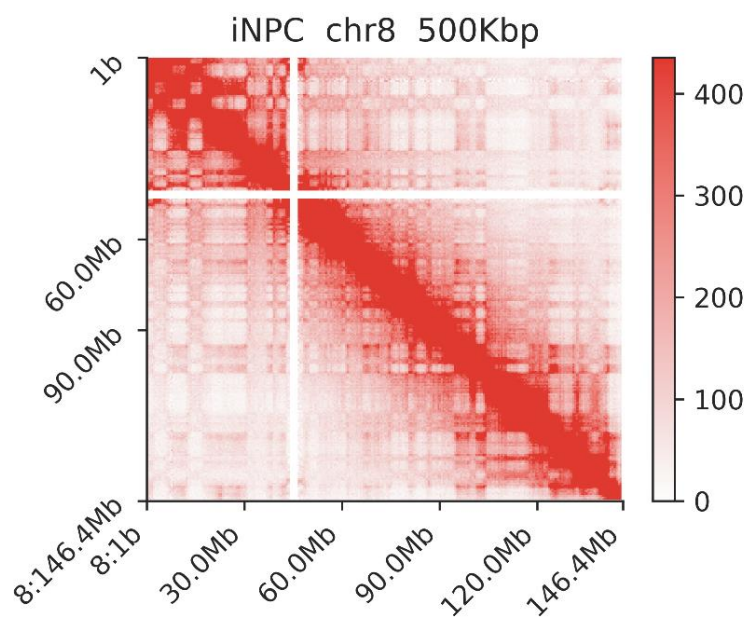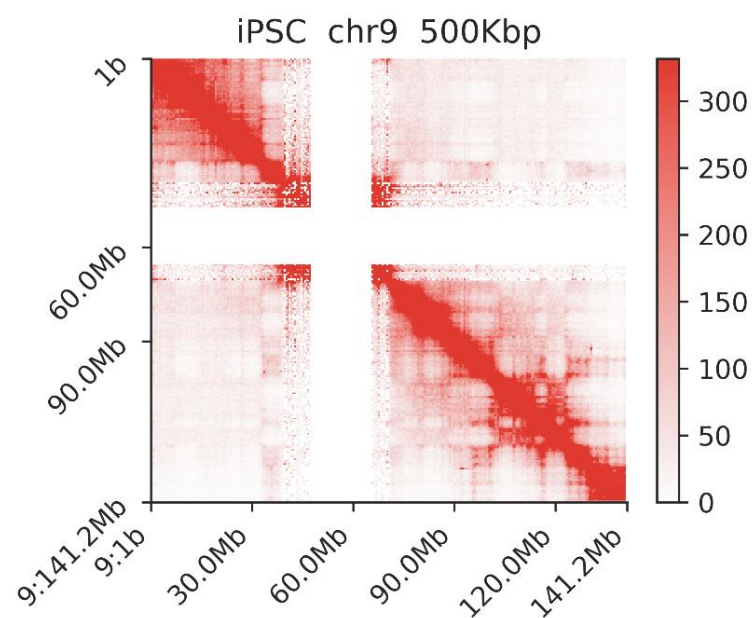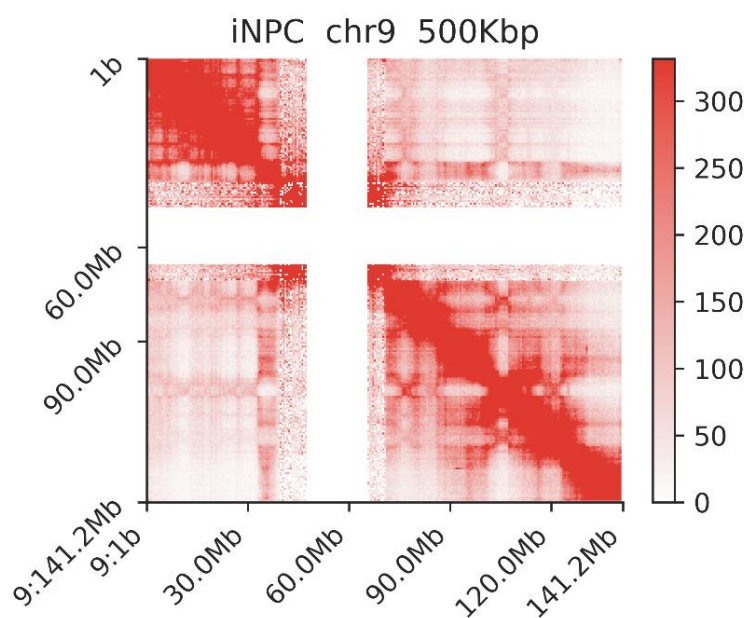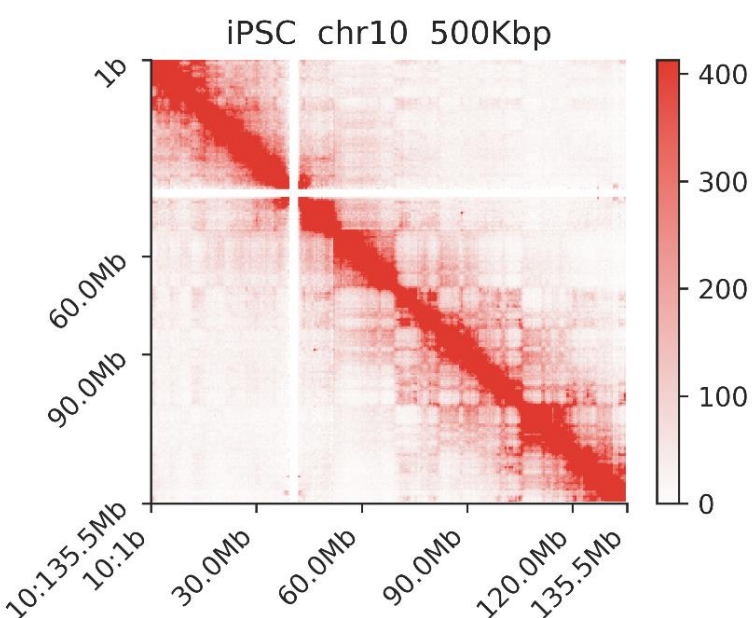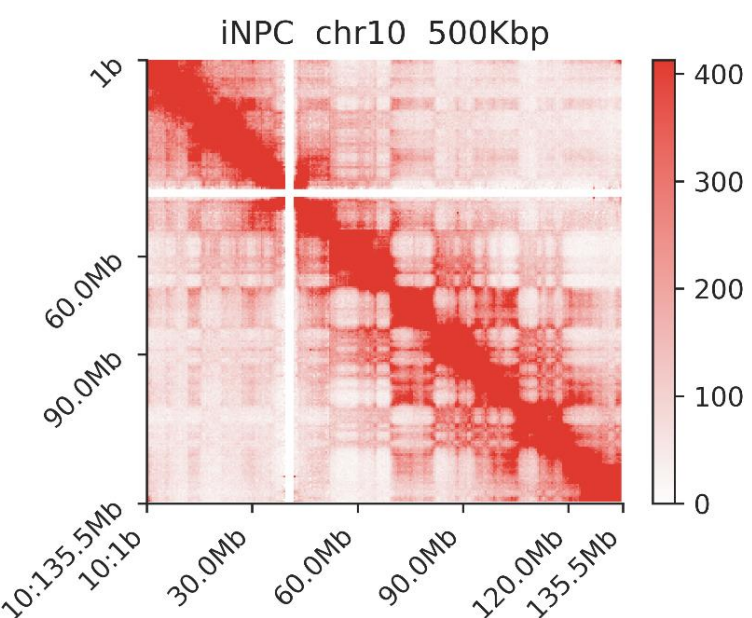

# Supplementary Figure 1 (continued)

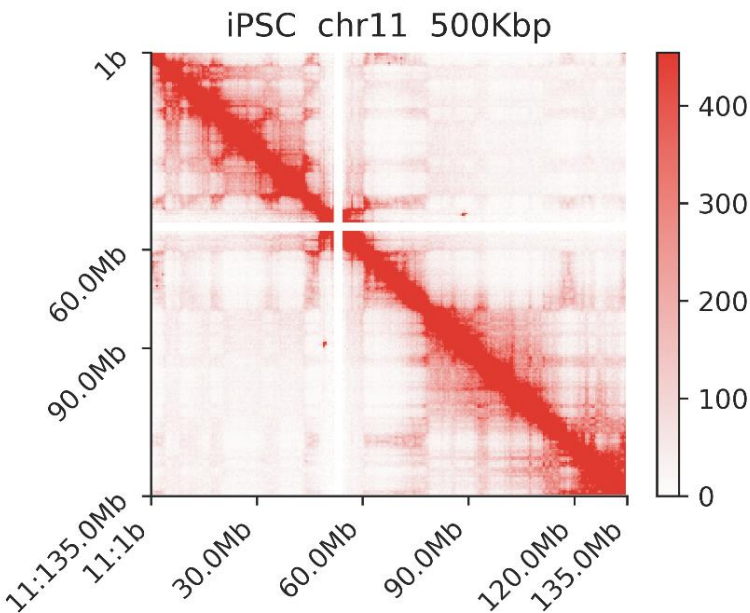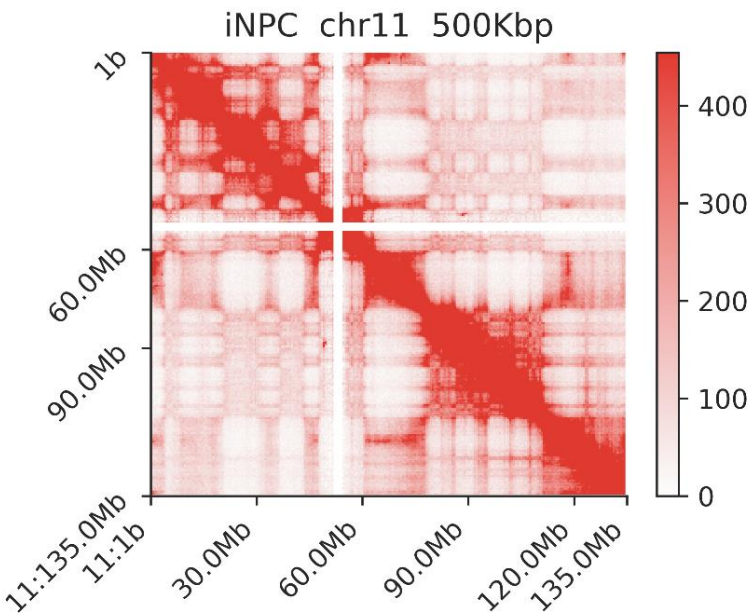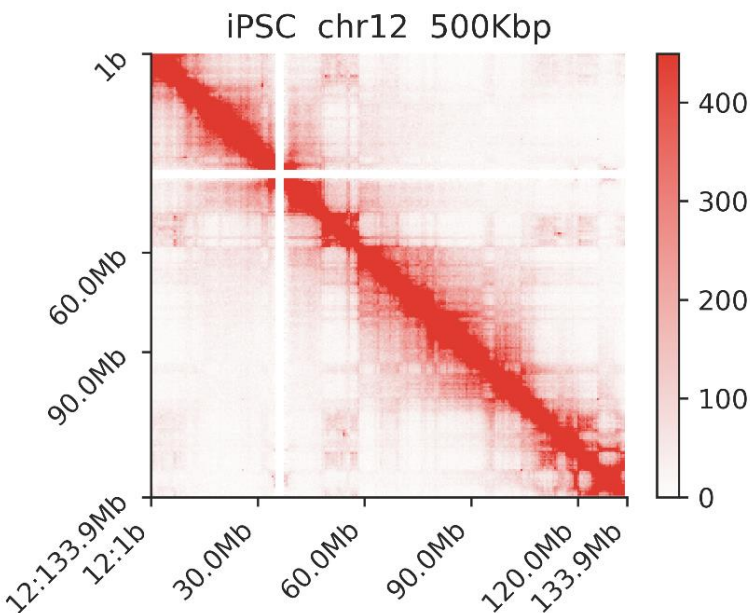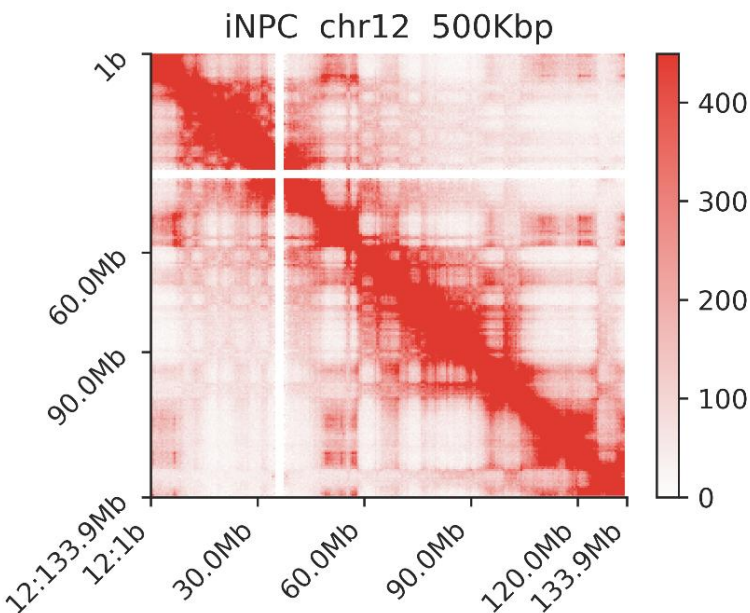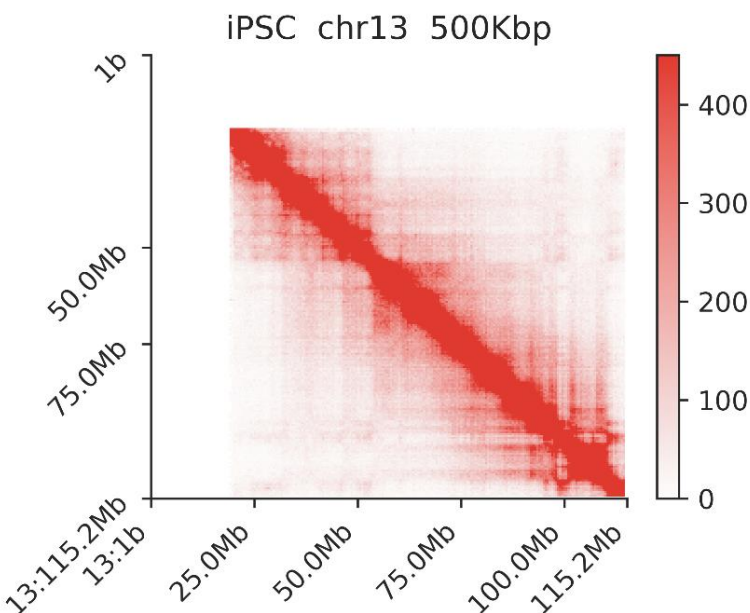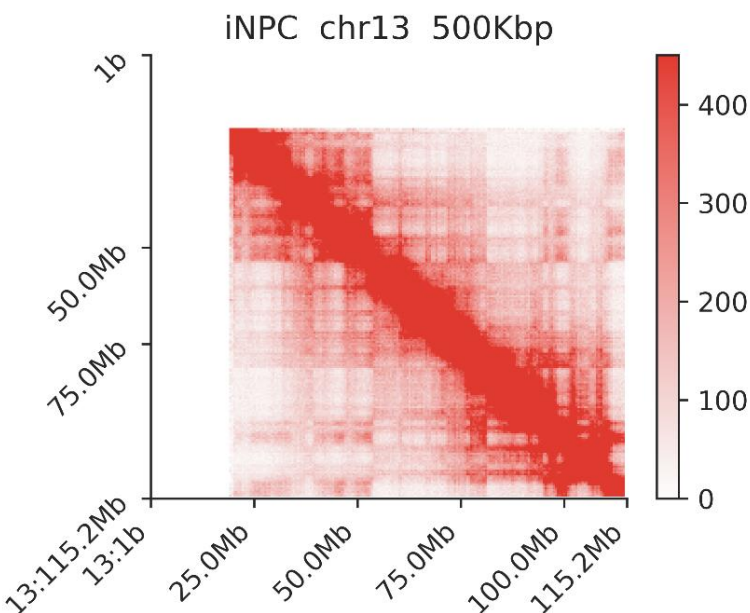

# Supplementary Figure 1 (continued)

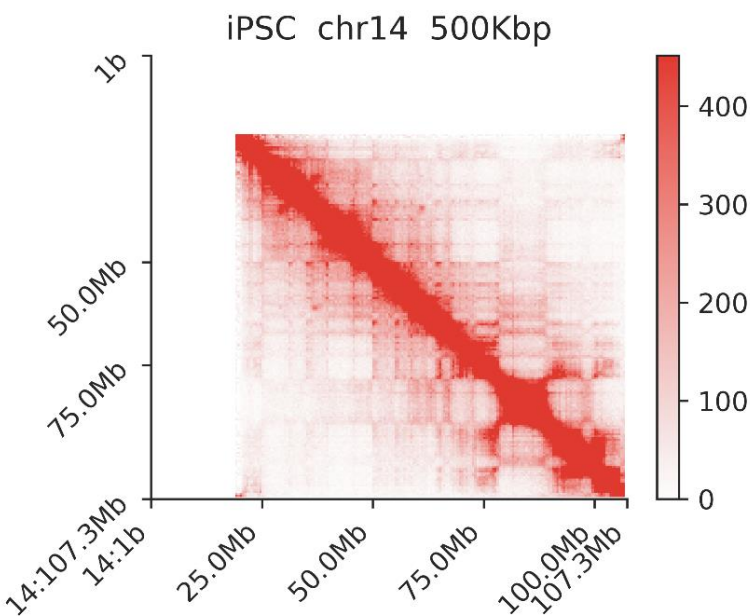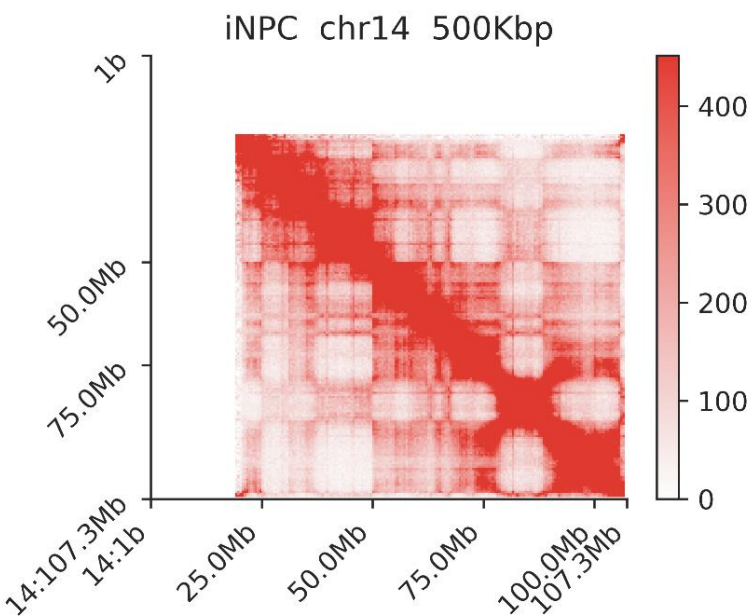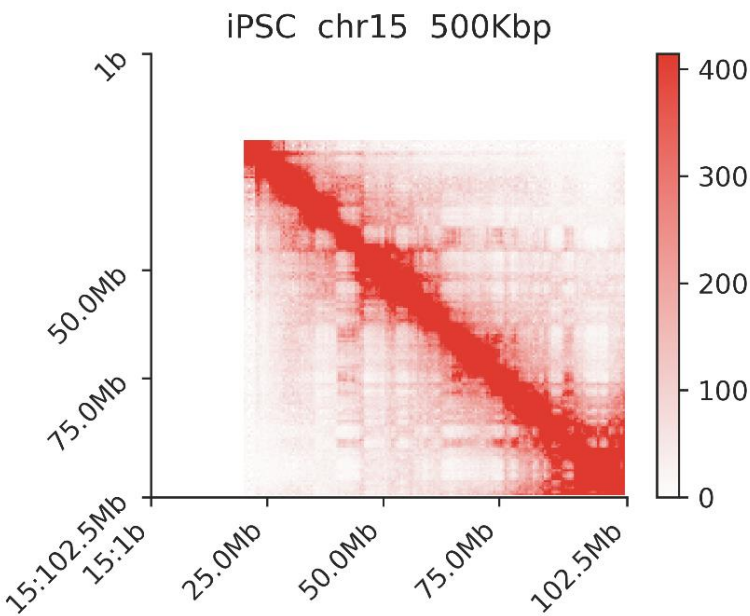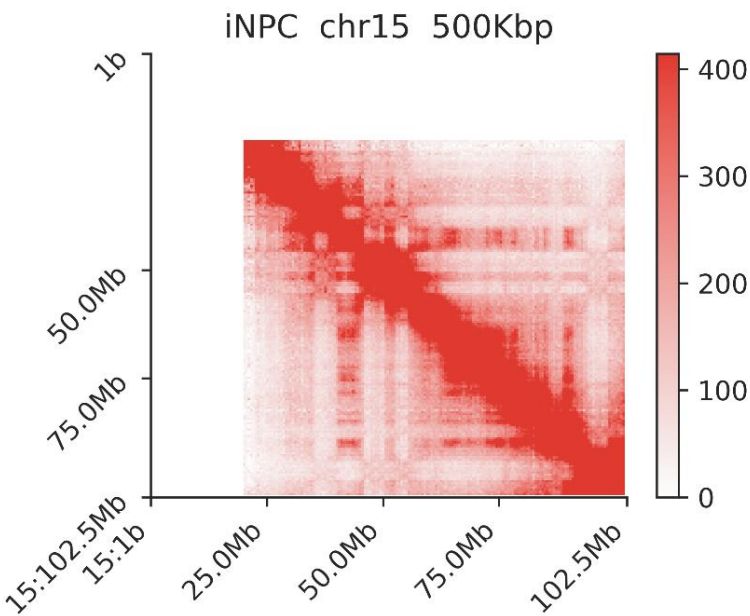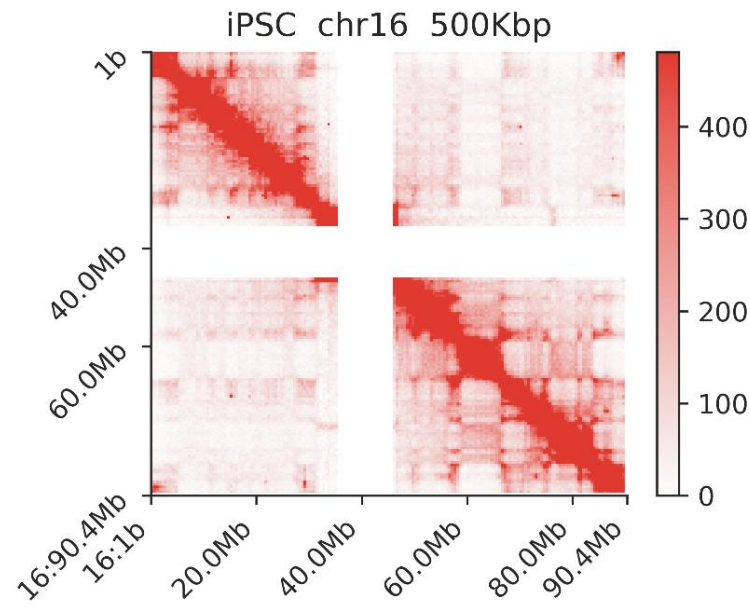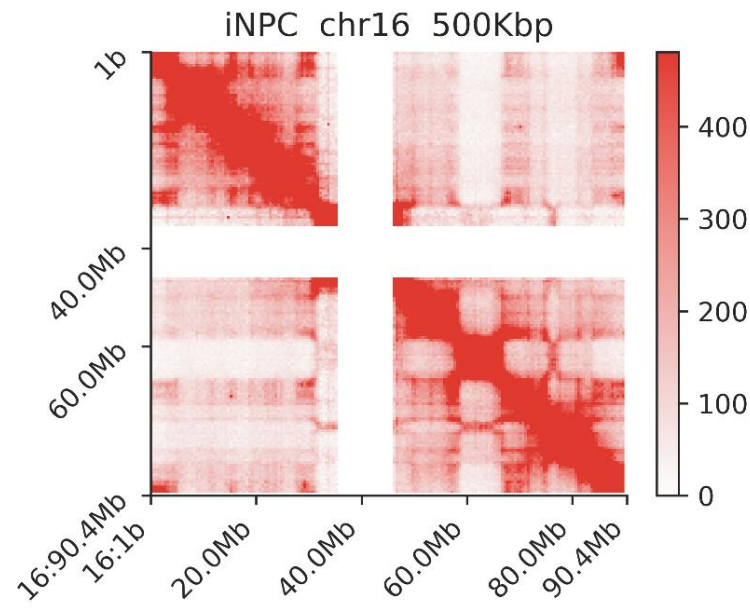

# Supplementary Figure 1 (continued)

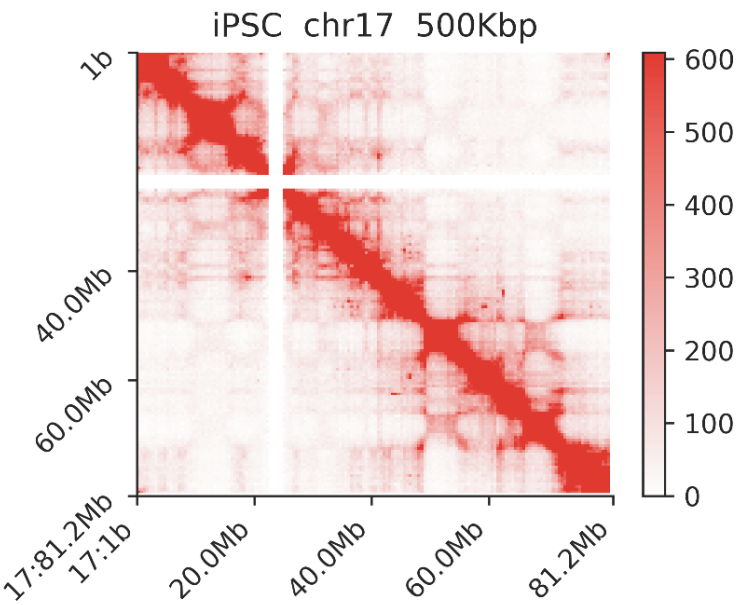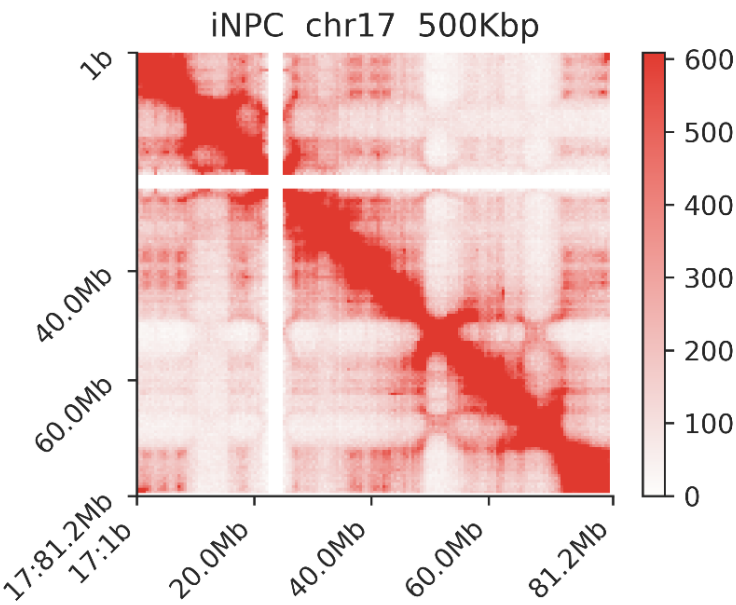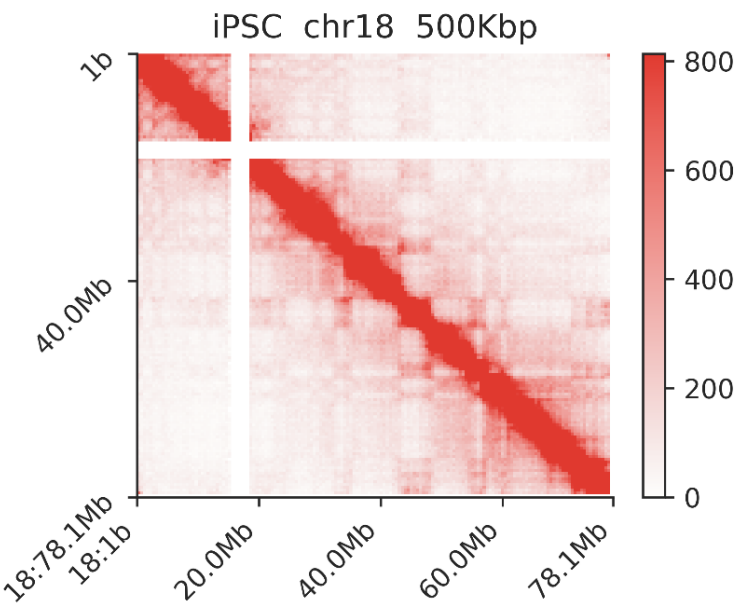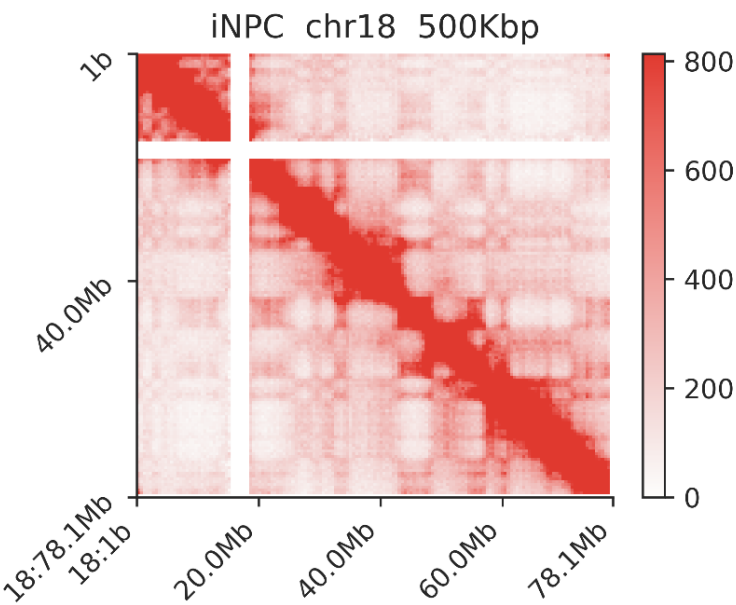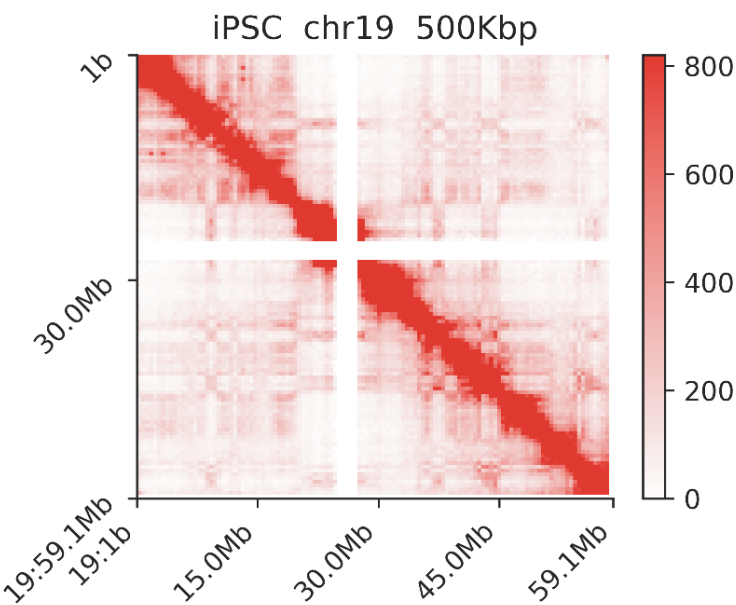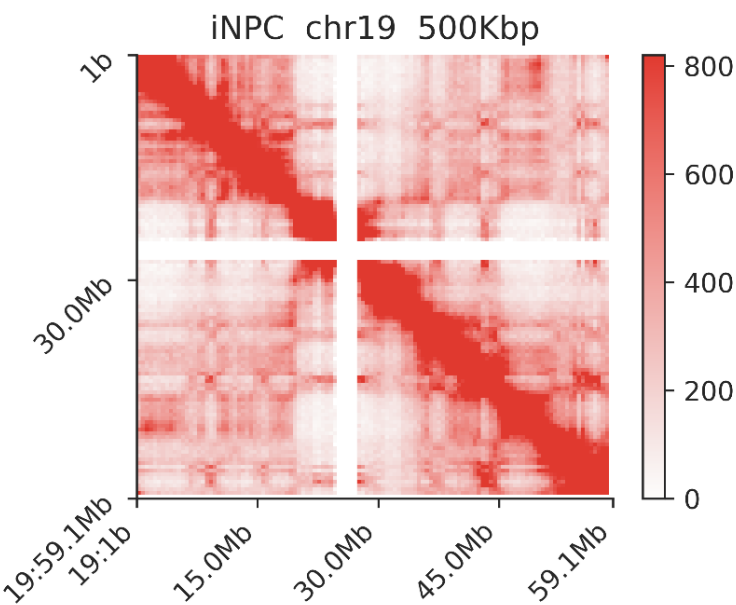

# Supplementary Figure 1 (continued)

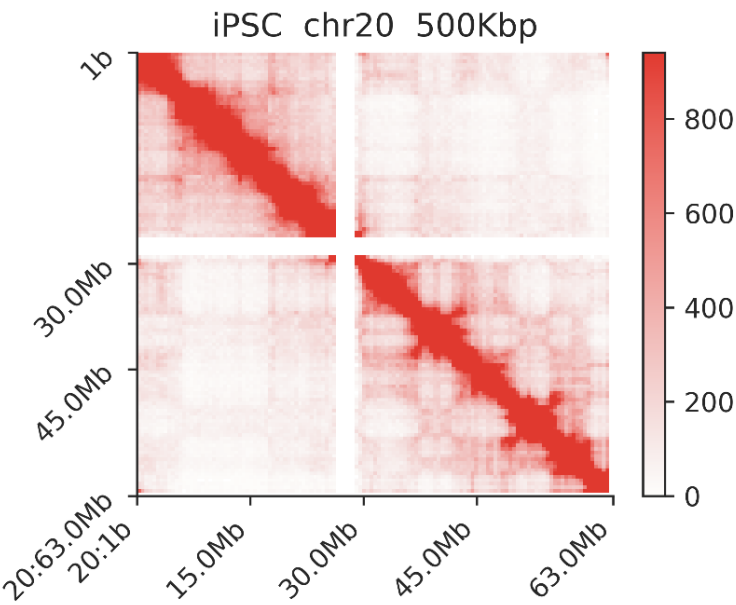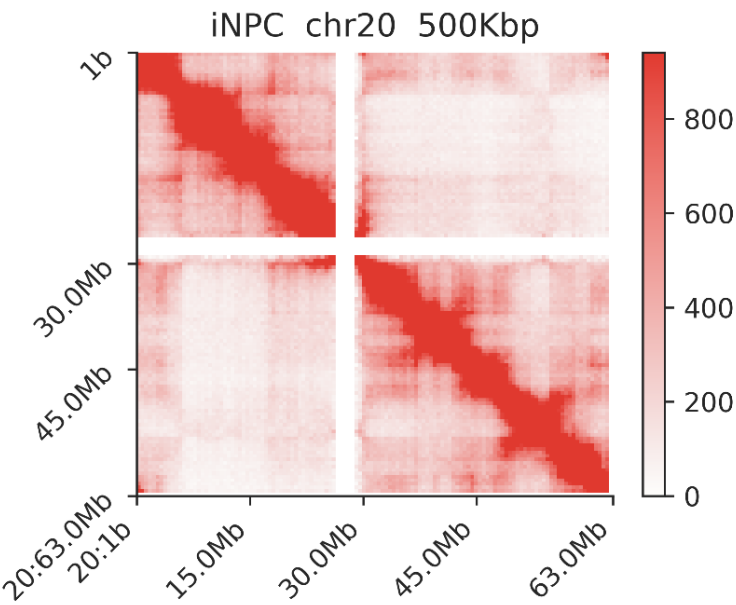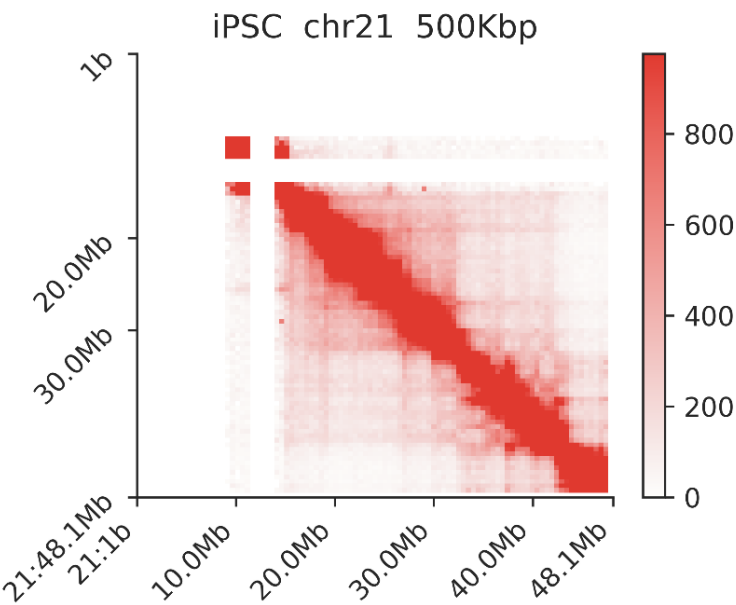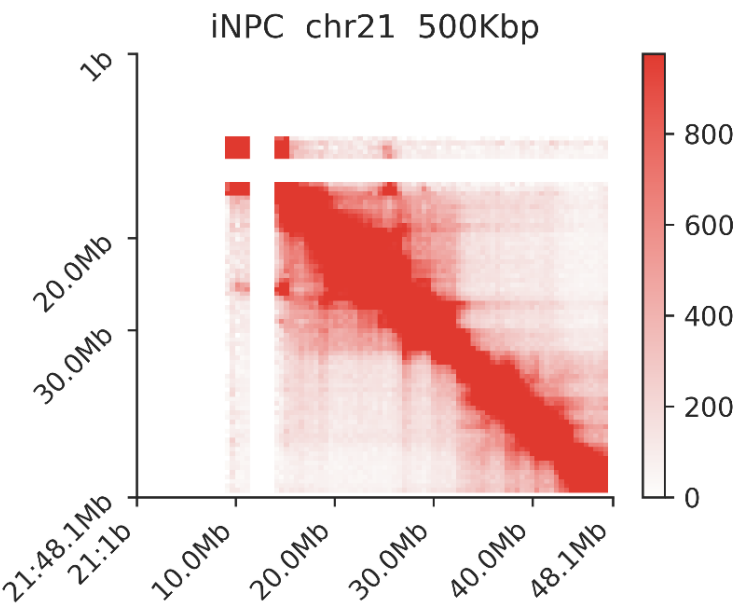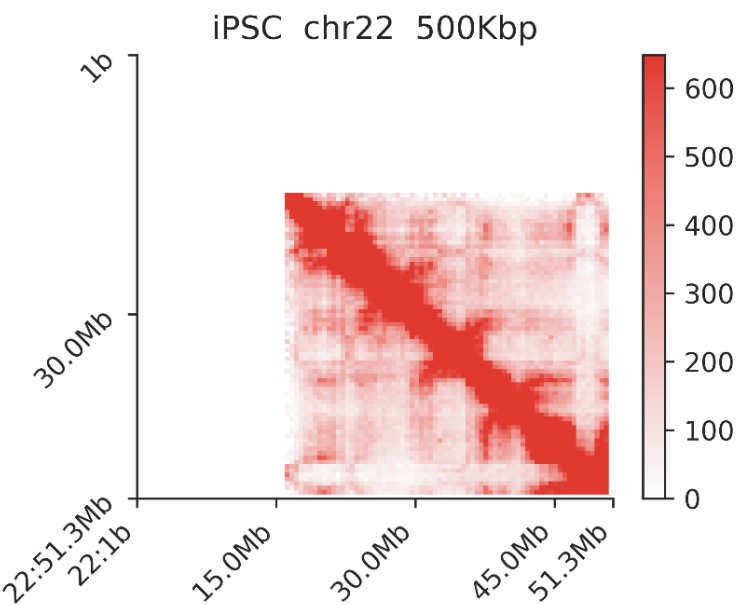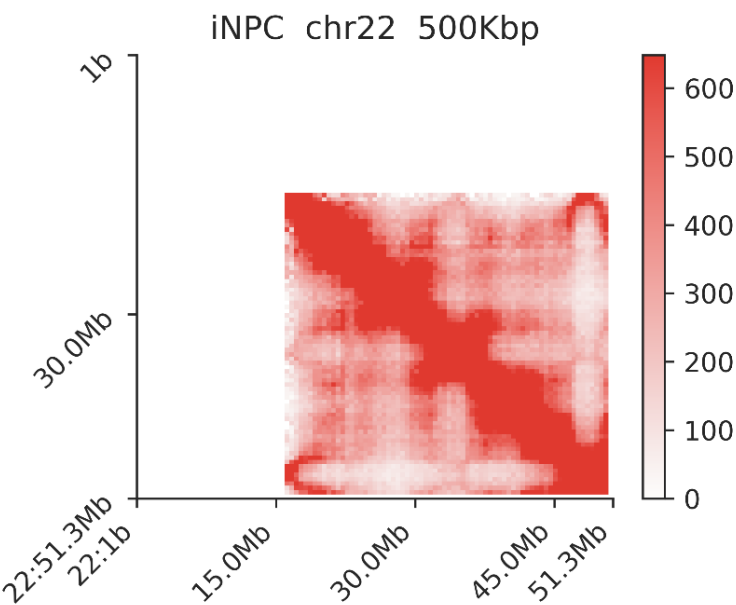

# Supplementary Figure 1 (continued)

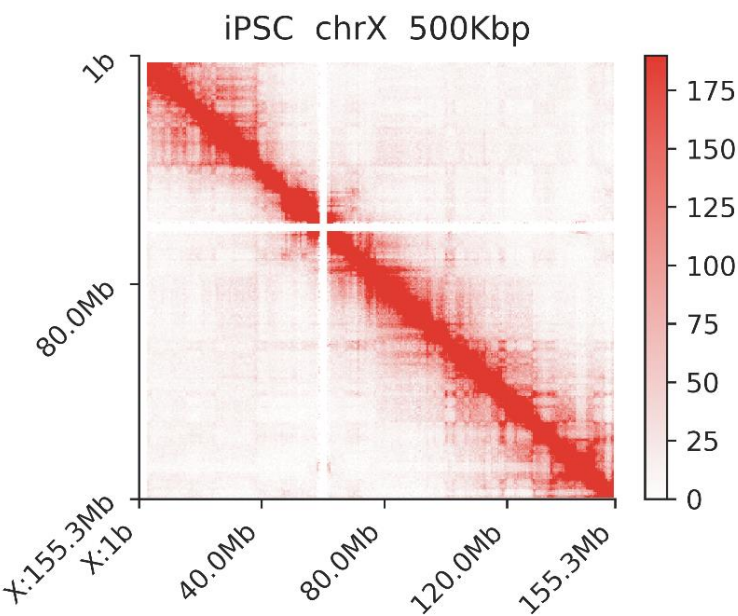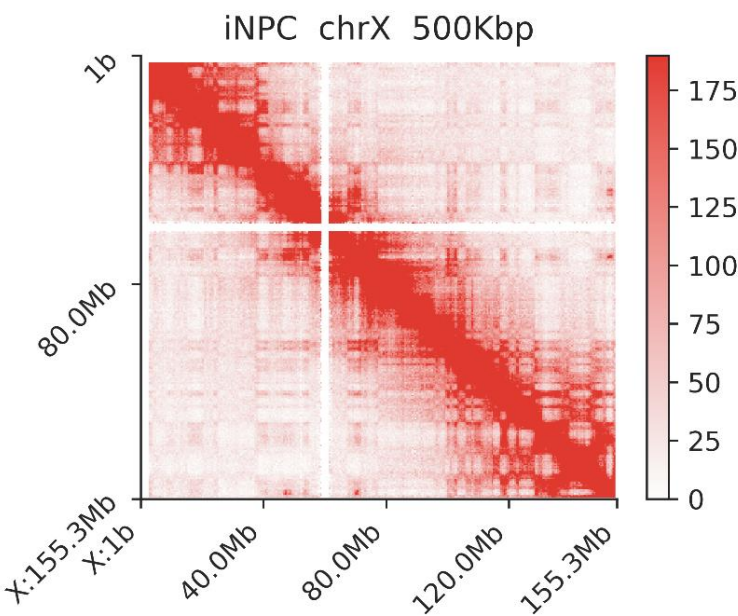

# Supplementary Figure 2

A

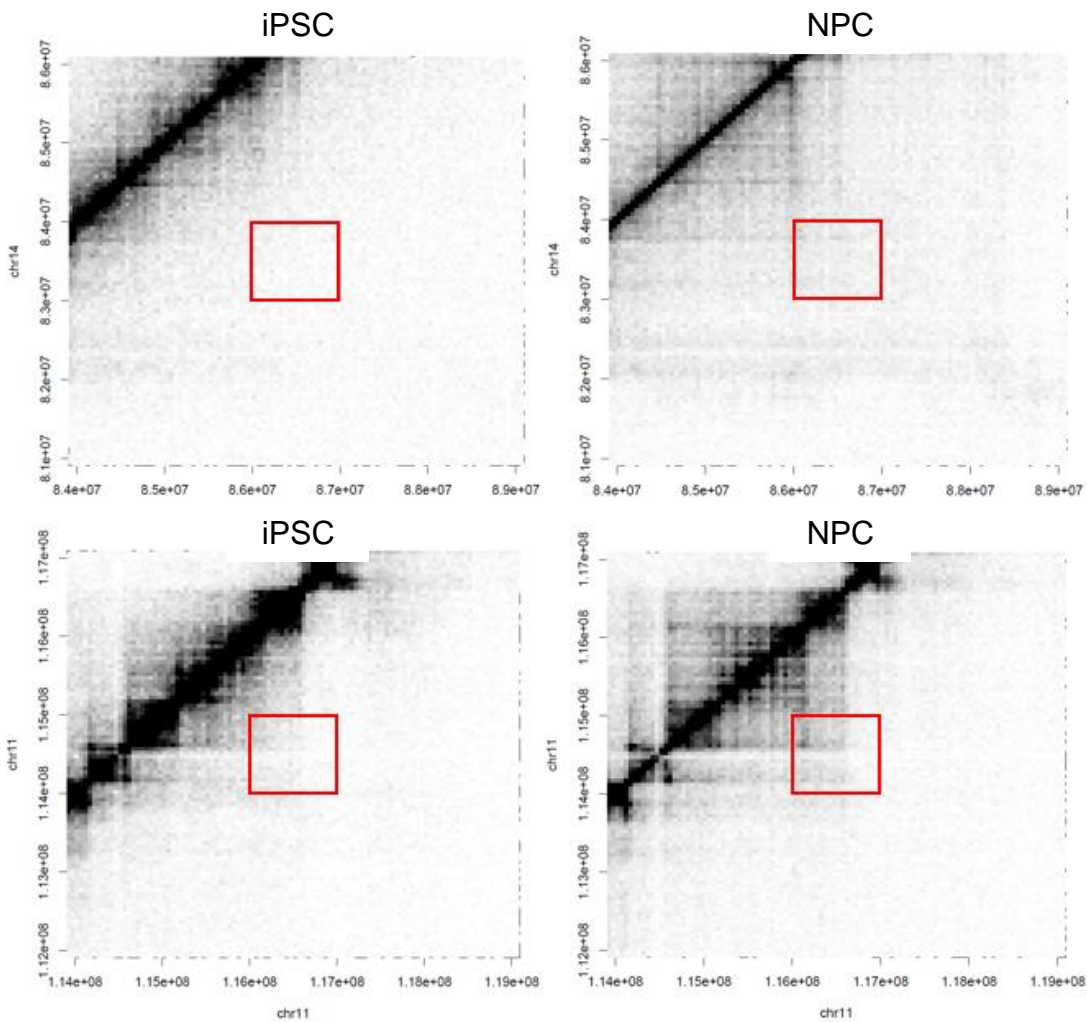

Increased interaction regions during NPC differentiation (FDR<0.01)

B

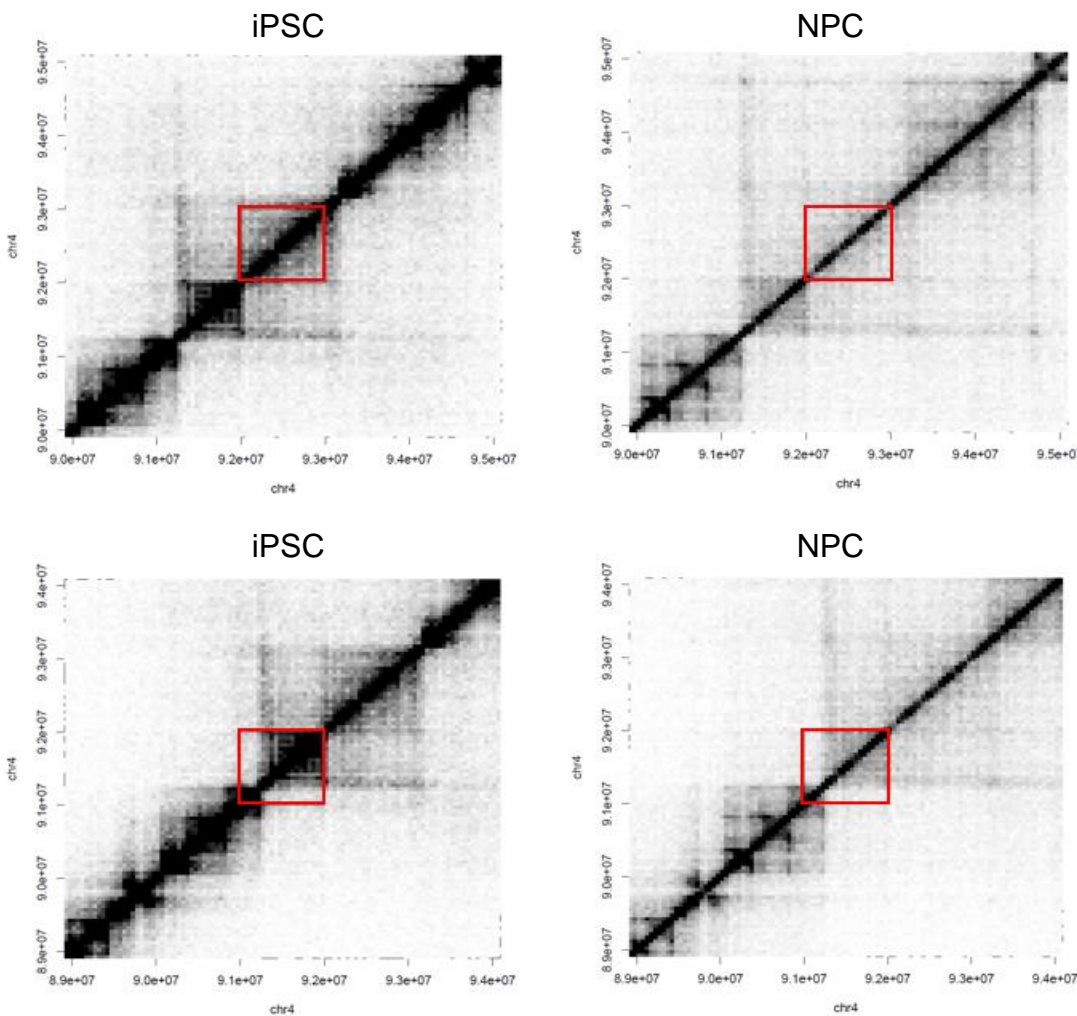

Decreased interaction regions during NPC differentiation (FDR<0.01)

# Supplementary Table 1

|       | Uniquely Mapped Reads |
|-------|-----------------------|
| hiPSC | 972,325,642           |
| NPC   | 758,445,782           |

# Supplementary Table 2

## Gene ontology analysis of iPSC Group1 and Group2

| Promoter-Promoter iPSC Group1                                 | P-Value   |
|---------------------------------------------------------------|-----------|
| G-protein coupled receptor signaling pathway                  | 5.00E-101 |
| detection of chemical stimulus involved in sensory perception | 8.80E-20  |
| epidermis development                                         | 4.00E-10  |
| keratinocyte differentiation                                  | 1.60E-09  |
| cellular defense response                                     | 2.00E-08  |
| embryonic skeletal system morphogenesis                       | 4.30E-06  |
| neuron fate specification                                     | 1.50E-04  |
| positive regulation of cytokine secretion                     | 2.50E-04  |
| regulation of complement activation                           | 3.30E-04  |
| neuronal action potential                                     | 4.00E-04  |
| spinal cord association neuron differentiation                | 4.30E-04  |
| cell fate determination                                       | 9.00E-04  |
| endocrine pancreas development                                | 1.80E-03  |
| proximal/distal pattern formation                             | 2.20E-03  |
| embryonic forelimb morphogenesis                              | 3.00E-03  |
| thyroid gland development                                     | 3.70E-03  |
| DNA methylation involved in gamete generation                 | 4.10E-03  |
| pancreas development                                          | 5.80E-03  |

| Promoter-Promoter interaction iPSC Group2                               | P-Value  |
|-------------------------------------------------------------------------|----------|
| transcription, DNA-templated                                            | 1.00E-13 |
| G2/M transition of mitotic cell cycle                                   | 3.90E-07 |
| stem cell population maintenance                                        | 1.00E-03 |
| cell cycle arrest                                                       | 1.80E-03 |
| strand displacement                                                     | 2.00E-03 |
| mitotic nuclear envelope disassembly                                    | 2.60E-03 |
| glycosaminoglycan biosynthetic process                                  | 2.60E-03 |
| histone H3 acetylation                                                  | 4.10E-03 |
| endosome to lysosome transport                                          | 4.20E-03 |
| regulation of cyclin-dependent protein serine/threonine kinase activity | 4.20E-03 |
| tRNA processing                                                         | 4.20E-03 |
| negative regulation of MAP kinase activity                              | 6.80E-03 |

# Supplementary Table 3

## Gene ontology analysis of NPC Group1 and Group2

| Promoter-Promoter interaction NPC Group1                               | P-Value   |
|------------------------------------------------------------------------|-----------|
| detection of chemical stimulus involved in sensory perception of smell | 2.00E-109 |
| G-protein coupled receptor signaling pathway                           | 2.50E-107 |
| immune response                                                        | 3.20E-20  |
| epidermis development                                                  | 2.90E-11  |
| keratinocyte differentiation                                           | 7.00E-09  |
| multicellular organism development                                     | 5.10E-08  |
| cellular protein metabolic process                                     | 7.00E-08  |
| cell differentiation                                                   | 2.20E-04  |
| embryonic skeletal system morphogenesis                                | 4.80E-04  |
| anterior/posterior pattern specification                               | 6.30E-04  |
| neuronal action potential                                              | 6.70E-04  |

| Promoter-Promoter interaction NPC Group2                | P-Value  |
|---------------------------------------------------------|----------|
| transcription, DNA-templated                            | 1.10E-23 |
| cell cycle                                              | 1.10E-08 |
| neural tube closure                                     | 2.10E-06 |
| mRNA splicing, via spliceosome                          | 1.50E-05 |
| transcription initiation from RNA polymerase I promoter | 5.10E-05 |
| cell-cell adhesion                                      | 1.30E-04 |
| neuron projection development                           | 2.00E-04 |
| positive regulation of protein phosphorylation          | 2.30E-04 |
| histone deacetylation                                   | 2.60E-04 |
